# Supplementary material for: Computational reconstruction of proteome-wide protein interaction networks between HTLV retroviruses and Homo sapiens
Source: PubMed Central journal article supplement (PMC4133621; doi:10.1186/1471-2105-15-245), 2014-07-18

## 1. Brief description of Modest AdaBoost [26].

1. Given training instances  $(x_1, y_1), \dots, (x_N, y_N)$ , initialize instance weights  $D_0(i) = 1/N$ ;
2. For  $m = 1, \dots, M$  and while  $f_m \neq 0$

- a. Use distribution  $D_m(i)$  and weighted least squares to train weak classifier:

$$h_m(x) = \arg \min_h \left( \sum_{i=1}^N D_m(i) \cdot (y_i - h(x_i))^2 \right) \quad (1)$$

- b. Compute the *inverted* distribution

$$\overline{D}_m(i) = (1 - D_m(i)) \overline{Z}_m \quad (2)$$

- c. Compute

$$P_m^{+1}(x) = P_{D_m}(y = +1 \wedge h_m(x)); \overline{P}_m^{+1}(x) = P_{\overline{D}_m}(y = +1 \wedge h_m(x)) \quad (3)$$

$$P_m^{-1}(x) = P_{D_m}(y = -1 \wedge h_m(x)); \overline{P}_m^{-1}(x) = P_{\overline{D}_m}(y = -1 \wedge h_m(x)) \quad (4)$$

- d. Set

$$f_m(x) = (P_m^{+1}(1 - \overline{P}_m^{+1}) - P_m^{-1}(1 - \overline{P}_m^{-1}))(x) \quad (5)$$

Update the weight distributions

$$D_{m+1}(i) = D_m(i) \exp(-y_i f_m(x_i)) / Z_m \quad (6)$$

3. Construct the final classifier

$$\mathbb{F}(x) = \sum_{m=1}^M f_m(x) \quad (7)$$

where  $\overline{Z}_m, Z_m$  are normalization factors,  $P_m^{+1}, P_m^{-1}$  denote the probability that the weak classifier  $h_m(x)$  assigns label  $\{+1, -1\}$  to the instance  $x$  under the weight distribution  $D_m$ , and similarly  $\overline{P}_m^{+1}, \overline{P}_m^{-1}$  denote the probability under the inverted weight distribution  $\overline{D}_m$ . From formula (6), we can see that the weight increases ( $D_{m+1}(i) > D_m(i)$ ) for those misclassified instances ( $y_i f_m(x_i) < 0$ ). The inverted weight distribution  $\overline{D}_m$  conversely assigns higher weights to those correctly-classified instances.  $\overline{D}_m$  pays more attention to those hard-to-classify or noisy instances, and  $D_m$  pays more attention to those regular or noise-free instances. The hypothesis yielded in each round of training  $f_m(x)$  takes both  $\overline{D}_m$  and  $D_m$  into account (see formula (5)), and then all the hypotheses are finally combined into a decision committee (see formula (7)).

## 2. Formal definitions of SP, SE, MCC, overall accuracy (Acc) and F1 score.

$$p_l = M_{l,l}, q_l = \sum_{i=1, i \neq l}^L \sum_{j=1, j \neq l}^L M_{i,j}, r_l = \sum_{i=1, i \neq l}^L M_{i,l}, s_l = \sum_{j=1, j \neq l}^L M_{l,j} \quad (8)$$

$$p = \sum_{l=1}^L p_l, q = \sum_{l=1}^L q_l, r = \sum_{l=1}^L r_l, s = \sum_{l=1}^L s_l$$

$$SP_l = \frac{p_l}{p_l + r_l}, l = 1, 2, \dots, L$$

$$SE_l = \frac{p_l}{p_l + s_l}, l = 1, 2, \dots, L \quad (9)$$

$$MCC_l = \frac{(p_l q_l - r_l s_l)}{\sqrt{(p_l + r_l)(p_l + s_l)(q_l + r_l)(q_l + s_l)}}, l = 1, 2, \dots, L$$

$$Acc = \frac{\sum_{l=1}^L M_{l,l}}{\sum_{i=1}^L \sum_{j=1}^L M_{i,j}} \quad (10)$$

$$MCC = \frac{(pq - rs)}{\sqrt{(p+r)(p+s)(q+r)(q+s)}}$$

where the confusion matrix  $M_{i,j}$  records the counts that class  $i$  are classified to class  $j$  and  $L$  denotes the number of labels.

$$F1\_score = \frac{2 \times SP_l \times SE_l}{SP_l + SE_l}, l = 1 \text{ denotes the positive class} \quad (11)$$

## 3. Figure S1 ROC curve for three experimental settings (Multi-instance AdaBoost, Multi-instance AdaBoost Novel, Single-instance AdaBoost) on the dataset S

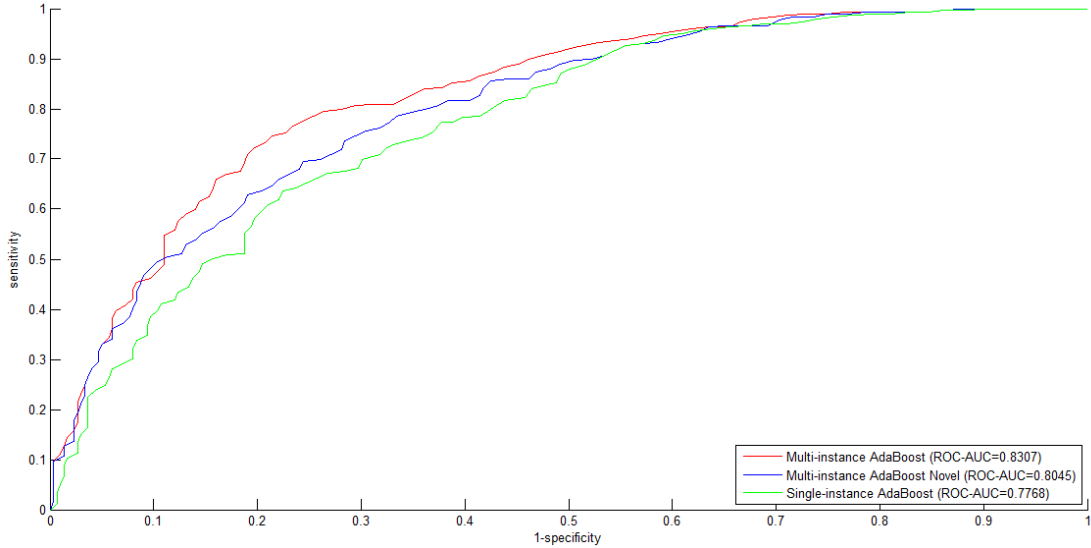

## 4. Figure S2 Precision-Recall curve for three experimental settings (Multi-instance AdaBoost, Multi-instance AdaBoost Novel, Single-instance AdaBoost) on the dataset S

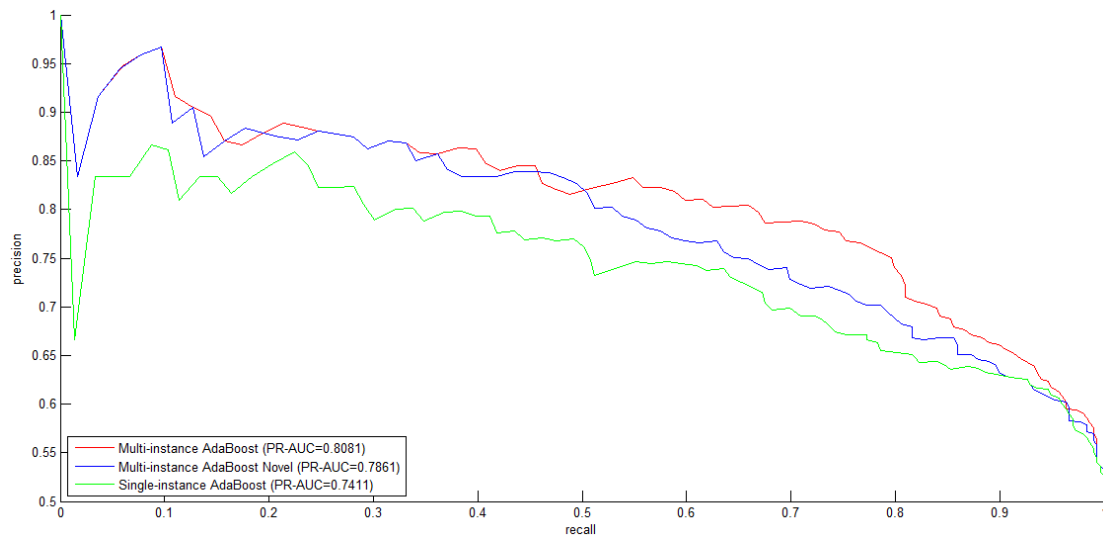

**5. Table S1 10-fold cross validation performance estimation on on the dataset S**

|                                   | <i>Multi-instance AdaBoost</i> |           |            | <i>Multi-instance AdaBoost Novel</i> |           |            | <i>Single-instance AdaBoost</i> |           |            |
|-----------------------------------|--------------------------------|-----------|------------|--------------------------------------|-----------|------------|---------------------------------|-----------|------------|
|                                   | <i>SP</i>                      | <i>SE</i> | <i>MCC</i> | <i>SP</i>                            | <i>SE</i> | <i>MCC</i> | <i>SP</i>                       | <i>SE</i> | <i>MCC</i> |
| <i>Positive (interaction)</i>     | 0.7393                         | 0.8060    | 0.6066     | 0.7129                               | 0.7559    | 0.5541     | 0.7128                          | 0.6722    | 0.5088     |
| <i>Negative (non-interaction)</i> | 0.7868                         | 0.7157    | 0.5949     | 0.7402                               | 0.6957    | 0.5445     | 0.6899                          | 0.7291    | 0.5191     |
| [ <i>Acc; MCC</i> ]               | [76.09%; 0.5991]               |           |            | [72.58%; 0.5486]                     |           |            | [70.07%; 0.5134]                |           |            |
| [ <i>ROC-AUC; PR-AUC</i> ]        | [ 0.8307; 0.8081]              |           |            | [0.8045; 0.7861]                     |           |            | [0.7768; 0.7411]                |           |            |
| <i>F1 Score</i>                   | 0.77                           |           |            | 0.73                                 |           |            | 0.69                            |           |            |

**6. Figure S3 The predicted HTLV-human PPI sub-network GO:0006120 (*biological process: mitochondrial electron transport, NADH to ubiquinone*). The green node denotes HTLV protein and the red node denotes human protein.**

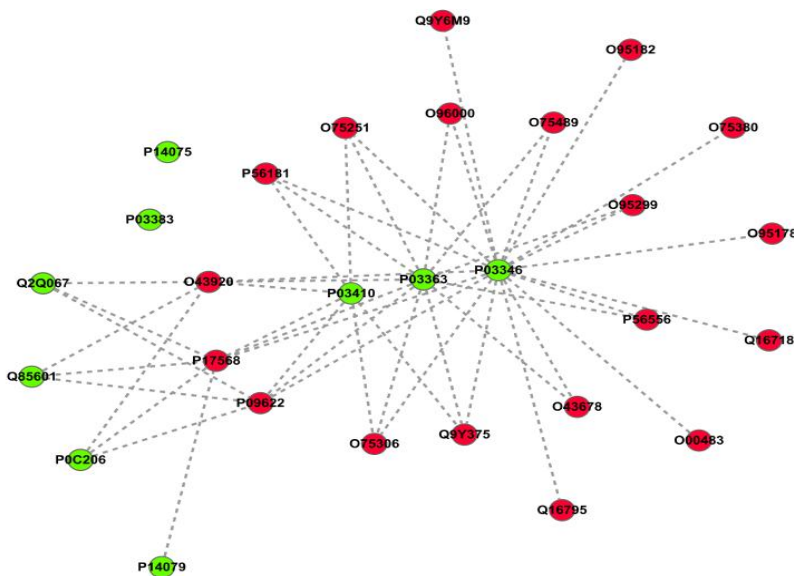

7. Figure S4 The predicted HTLV-human PPI sub-network GO:0005344 (*molecular function: oxygen transporter activity*). The green node denotes HTLV protein and the red node denotes human protein.

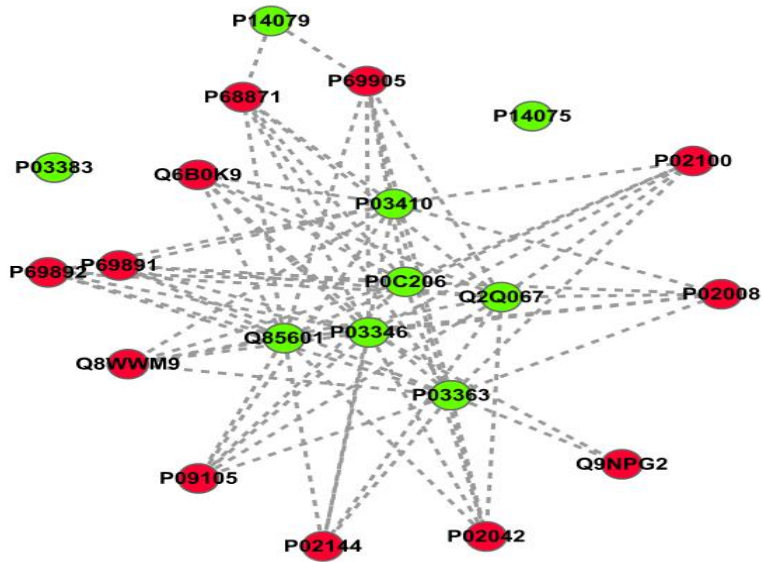

Supplement: 12859_2014_6529_MOESM1_ESM.pdf [file 12859_2014_6529_MOESM1_ESM.pdf]
